# Supplementary material for: Selective and precise solid phase extraction based on a magnetic cellulose gold nanocomposite followed by ICP-OES analysis for monitoring of total sulfur content in liquid fuels
Source: Royal Society of Chemistry journal article supplement (doi:10.1039/d4ra04427d), 2024-01-01
Supplement: d4ra04427d1.pdf [file d4ra04427d1.pdf]

## Selective and precise solid phase extraction based on magnetic cellulose gold nanocomposite followed by ICP-OES analysis for monitoring of total sulfur content in liquid fuels

Kgomotso G. Mabena<sup>a</sup>, Philiswa N. Nomngongo<sup>b</sup>, Nomvano Mketso<sup>a1</sup>

<sup>a</sup>*Department of Chemistry, College of Science and Engineering and Technology, Florida Science Campus, University of South Africa, Roodepoort, 1710, Johannesburg, South Africa*

<sup>b</sup>*Department of Chemical Sciences, University of Johannesburg, PO Box 17011, Doornfontein 2028, Johannesburg, South Africa.*

**Table S1.** Operating parameters and conditions of ICP-OES for total sulfur analysis

| Parameters                        | Conditions  |
|-----------------------------------|-------------|
| RF Power (W)                      | 1200 W      |
| Auxiliary gas flow rate(L/min)    | 1.5 L/min   |
| Plasma gas (Ar) flow rate (L/min) | 15.0 L/min  |
| Pump speed (rpm)                  | 85 rpm      |
| Peri-pump speed analysis (s)      | 15 s        |
| Stabilization time (s)            | 15 s        |
| Nebulizer gas flow rate (L/min)   | 0.75L/min   |
| Elemental wavelength              | S (182.562) |
| Replicates                        | 3           |

<sup>1</sup> Corresponding author: Email address: nomvano.mketso@gmail.com or mketon@unisa.ac.za; Tel: +27114712032

**Table S2.** The minimum and maximum amount used for different parameters for screening.

| Variable                 | Minimum (-) | Maximum (+) |
|--------------------------|-------------|-------------|
| Mass of sorbent (mg)     | 5           | 50          |
| Sorption time (min)      | 10          | 60          |
| pH                       | 4           | 9           |
| Eluent volume ( $\mu$ L) | 100         | 1000        |
| Elution time (min)       | 4           | 10          |
